# Supplementary material for: Is the toxic potential of nanosilver dependent on its size?
Source: PubMed Central journal article supplement (PMC4274708; doi:10.1186/s12989-014-0065-1), 2014-12-03

## Material

## Ag (80 nm)

|                                                                                   |                                                                                                                                             |
|-----------------------------------------------------------------------------------|---------------------------------------------------------------------------------------------------------------------------------------------|
| <b>NanoTOES number</b>                                                            | NanoTOES_Ag_80                                                                                                                              |
| <b>Provider</b>                                                                   | Bayer Technology Services GmbH                                                                                                              |
| <b>Concentration</b>                                                              | 1 % (wt/wt) in water<br>1.03*10 <sup>13</sup> NPs/ml                                                                                        |
| <b>Specific Surface Area</b>                                                      | 7.56 m <sup>2</sup> /g                                                                                                                      |
| <b>Size/<br/>Size distribution &amp;<br/>Agglomeration/<br/>Aggregation state</b> | DLS: (Correlation Func., Number Distribution)<br>101.3 nm +/-1.5 ; PDI= 0.115<br>TEM: d50= 78 nm, d90= 96 nm<br>AC: d50= 77 nm, d90= 100 nm |
| <b>Shape</b>                                                                      | quasi spherical                                                                                                                             |
| <b>Crystal Structure</b>                                                          | cubic                                                                                                                                       |
| <b>Surface Chemistry</b>                                                          | XPS: Atom% C 59.1 O 17.5, Ag 15.9, N 7.5<br>SIMS: Ag, Cl, C <sub>x</sub> H <sub>y</sub> O <sub>z</sub>                                      |
| <b>pH (in water)</b>                                                              | 5.9                                                                                                                                         |
| <b>Surface Charge</b>                                                             | Zeta potential: - 12.5 mV+/- 0.5<br>IEP: ~ pH 3.6                                                                                           |

**Scanning (Raster)  
Electron Microscopy  
(SEM)**

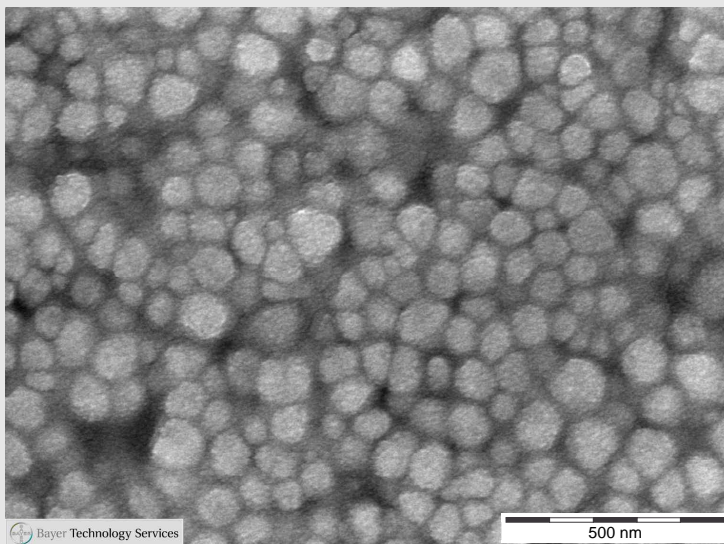

**Transmission Electron  
Microscopy  
(TEM)**

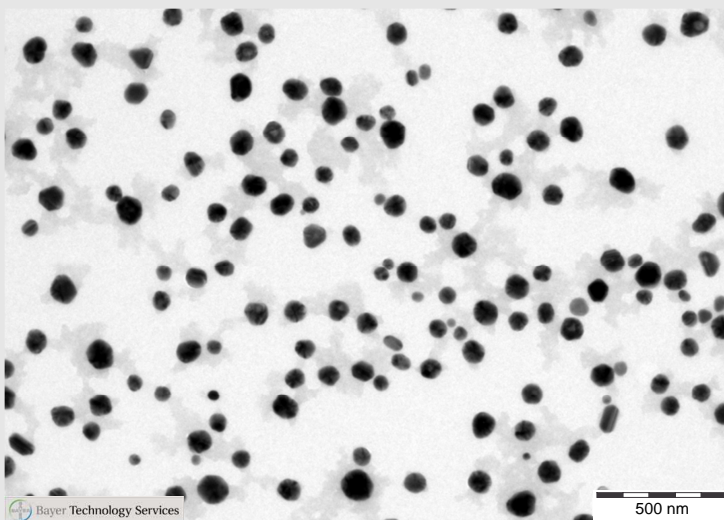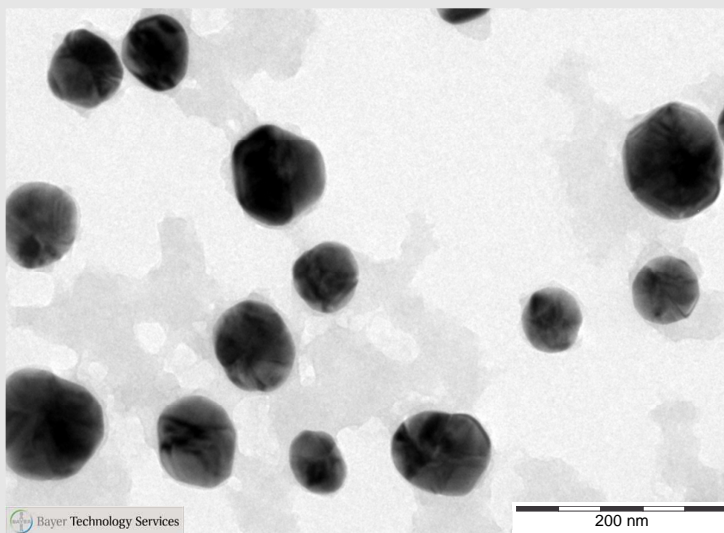

## X-ray Diffraction (XRD)

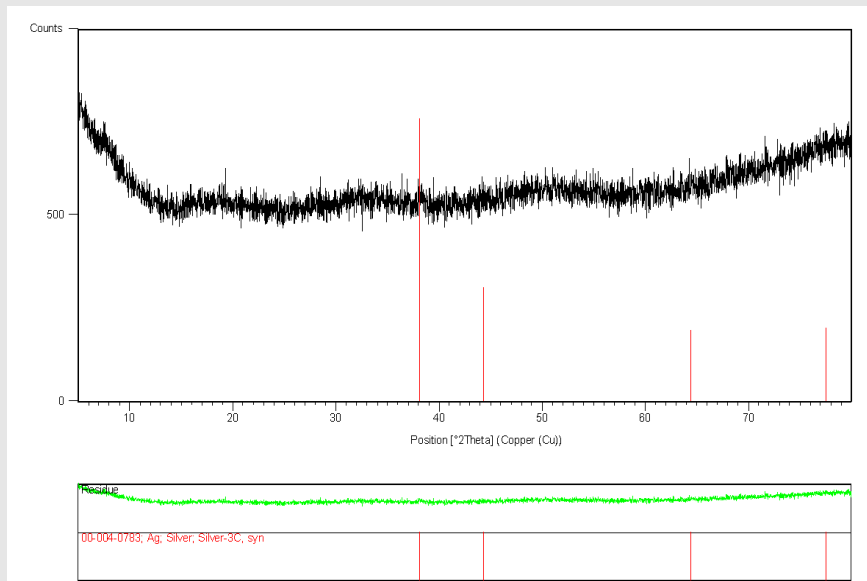

## X-ray Photoelectron Spectroscopy (XPS)

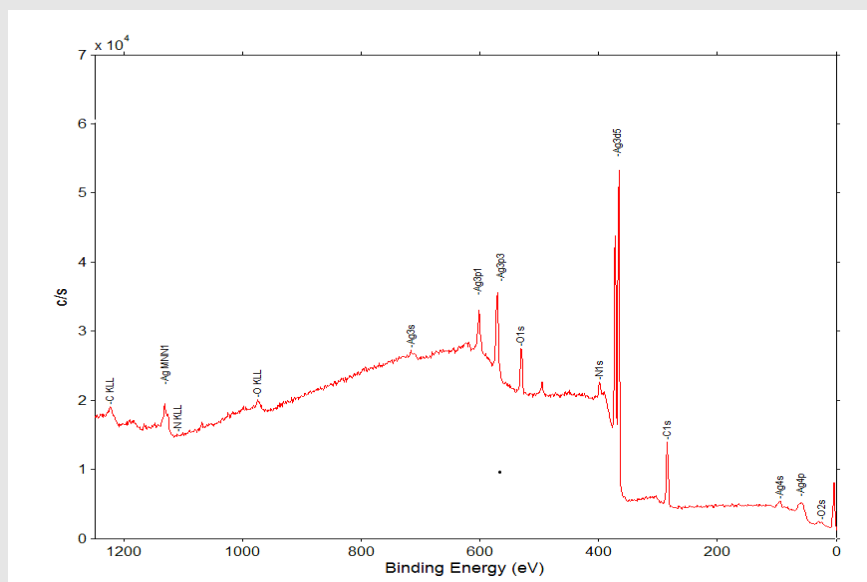

**Analytical Ultracentrifugation (AC)**

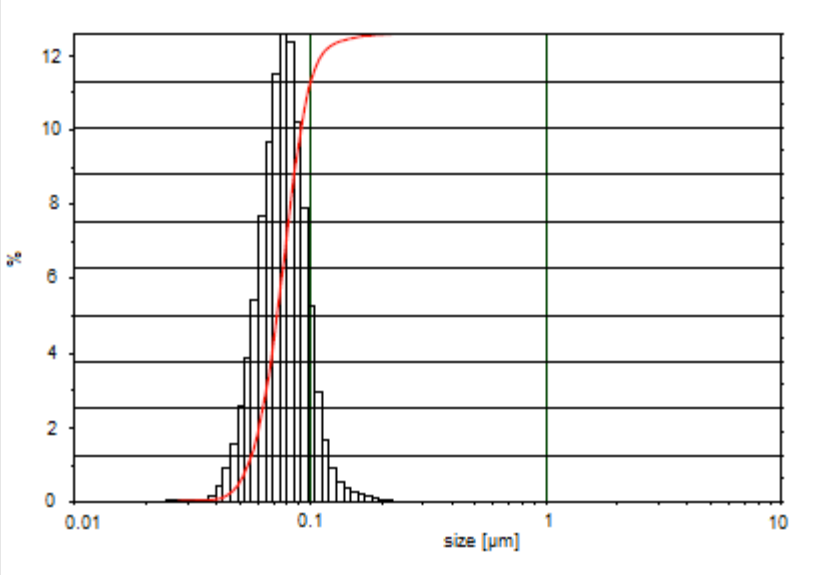

**Zeta Potential & Isoelectric Point**

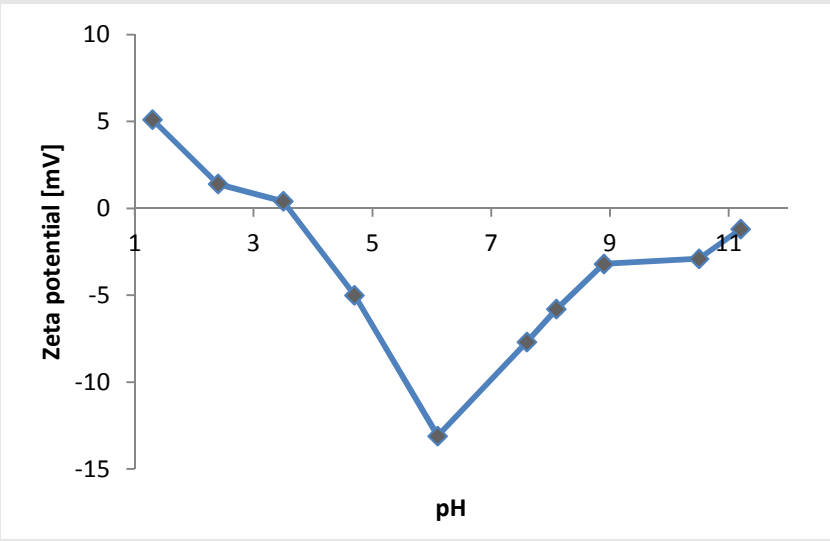

Supplement: 12989_2014_65_MOESM2_ESM.pdf [file 12989_2014_65_MOESM2_ESM.pdf]
