# Supplementary material for: Is the toxic potential of nanosilver dependent on its size?
Source: PubMed Central journal article supplement (PMC4274708; doi:10.1186/s12989-014-0065-1), 2014-12-03

## Material

## Ag (200 nm)

|                                                                                   |                                                                                                                                                |
|-----------------------------------------------------------------------------------|------------------------------------------------------------------------------------------------------------------------------------------------|
| <b>NanoTOES number</b>                                                            | NanoTOES_Ag_200                                                                                                                                |
| <b>Provider</b>                                                                   | Bayer Technology Services GmbH                                                                                                                 |
| <b>Concentration</b>                                                              | 1 % (wt/wt) in water<br>1.94*10 <sup>12</sup> NPs/ml                                                                                           |
| <b>Specific Surface Area</b>                                                      | 3.87 m <sup>2</sup> /g                                                                                                                         |
| <b>Size/<br/>Size distribution &amp;<br/>Agglomeration/<br/>Aggregation state</b> | DLS: (Correlation Func., Number Distribution)<br>272.5 nm +/-2.2 ; PDI= 0.136<br>TEM: d50= 168 nm, d90= 255 nm<br>AC: d50= 150 nm, d90= 380 nm |
| <b>Shape</b>                                                                      | quasi spherical                                                                                                                                |
| <b>Crystal Structure</b>                                                          | cubic                                                                                                                                          |
| <b>Surface Chemistry</b>                                                          | XPS: Atom % C 58.1, O 18.0, Ag 15.4, N 7.5, Na 1.0<br>SIMS: Ag, Na, K, C <sub>x</sub> H <sub>y</sub> O <sub>z</sub>                            |
| <b>pH (in water)</b>                                                              | 6.0                                                                                                                                            |
| <b>Surface Charge</b>                                                             | Zeta potential: - 5.5 mV+/- 0.5<br>IEP: ~ 4.2 pH                                                                                               |

**Scanning (Raster)  
Electron Microscopy  
(SEM)**

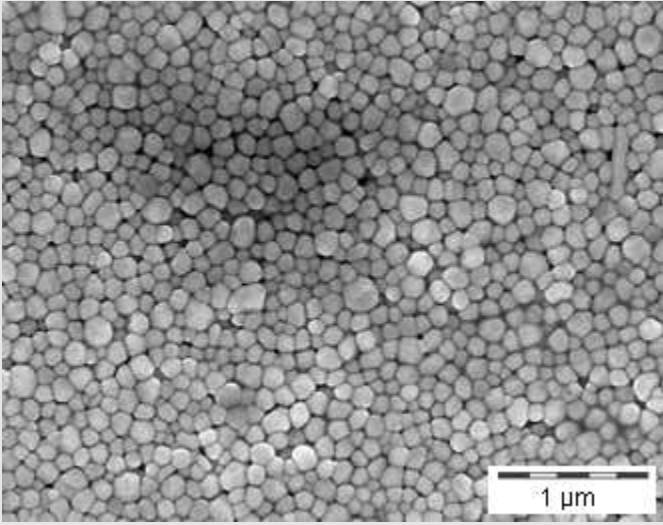

**Transmission Electron  
Microscopy  
(TEM)**

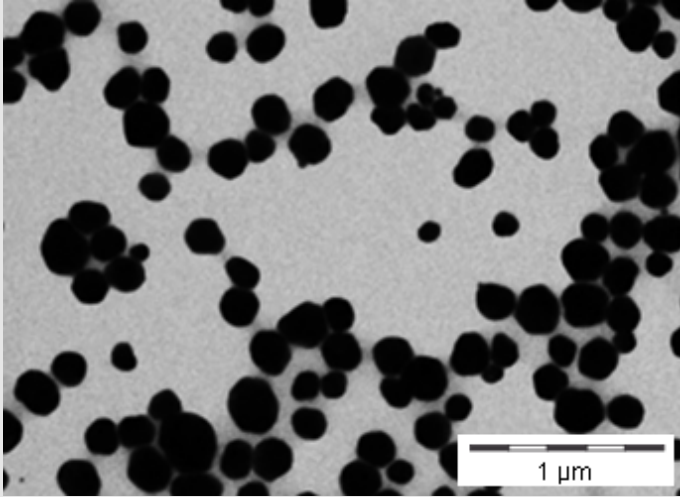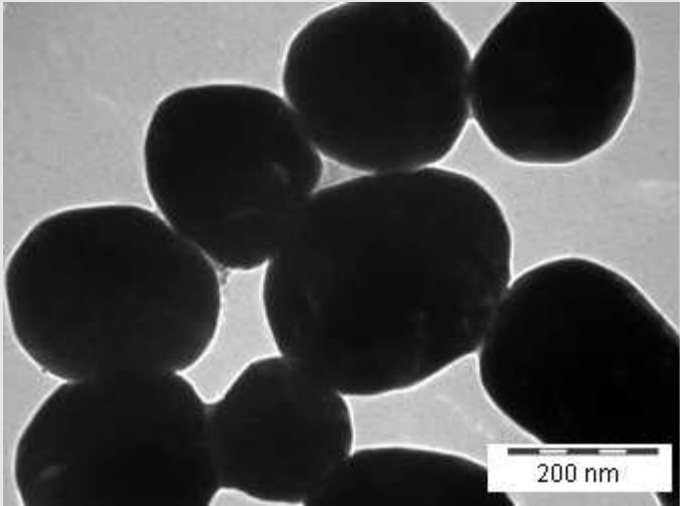

### X-ray Diffraction (XRD)

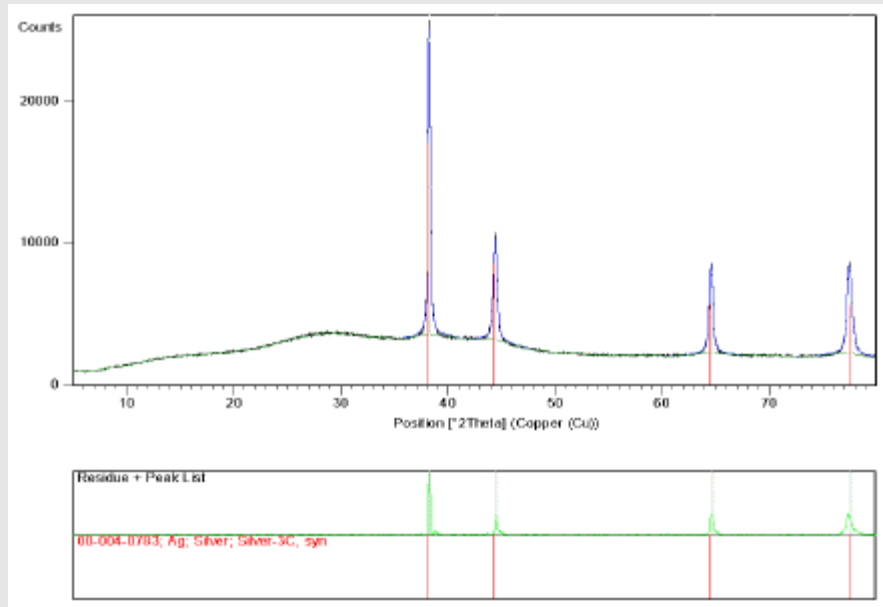

### X-ray Photoelectron Spectroscopy (XPS)

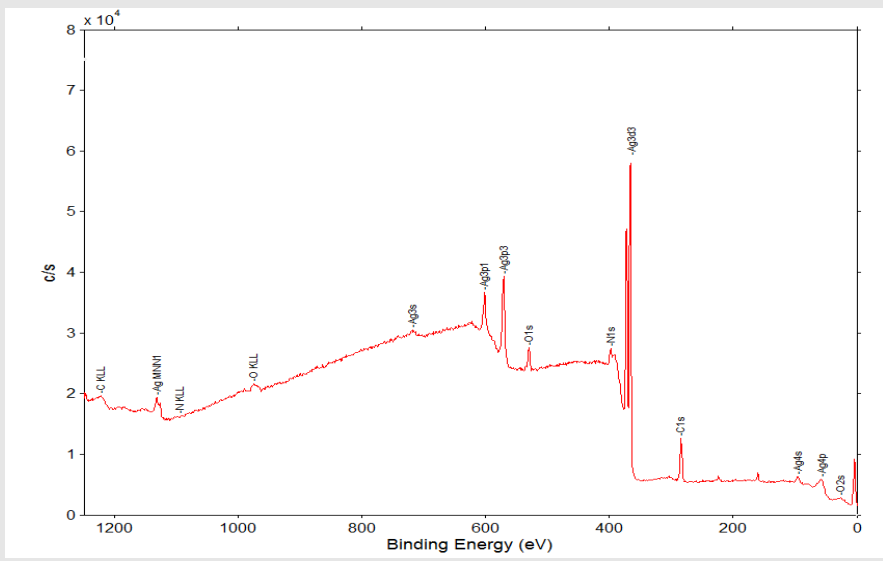

**Analytical  
Ultracentrifugation  
(AC)**

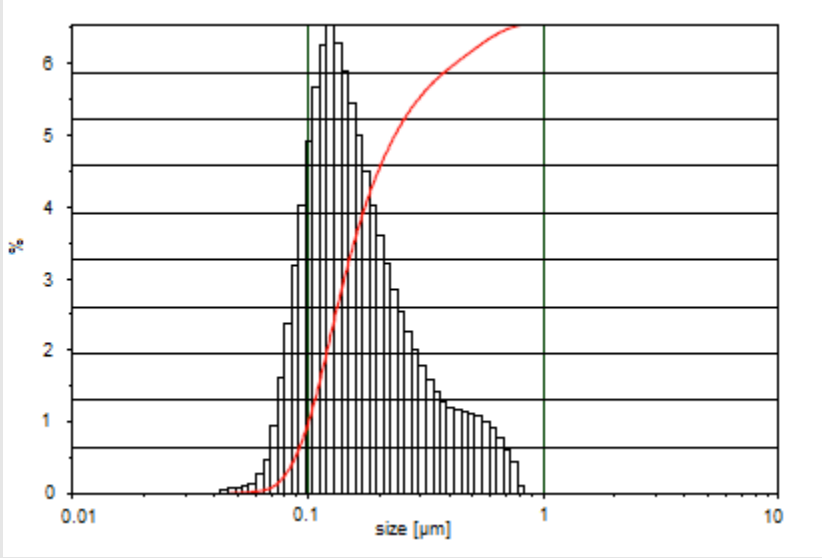

**Zeta Potential &  
Isoelectric Point**

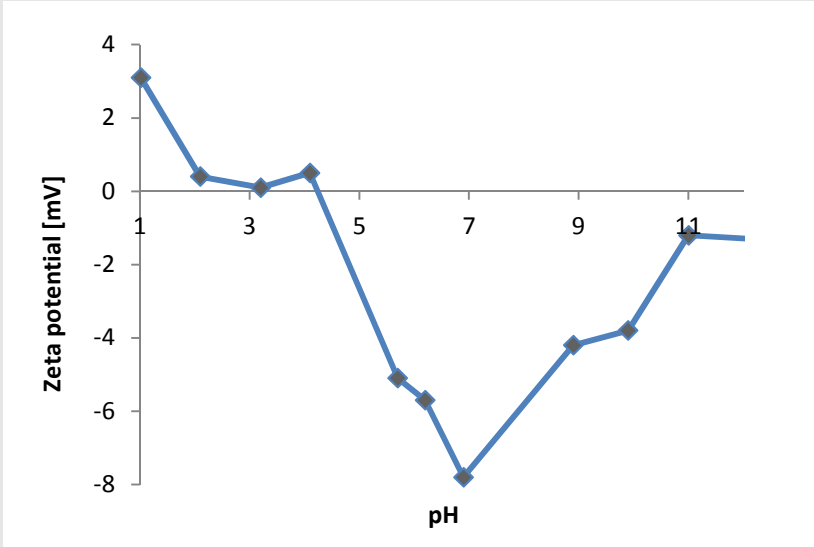

Supplement: 12989_2014_65_MOESM3_ESM.pdf [file 12989_2014_65_MOESM3_ESM.pdf]
